# Supplementary material for: Bridging the Polar and Hydrophobic Metabolome in Single-Run Untargeted Liquid Chromatography-Mass Spectrometry Dried Blood Spot Metabolomics for Clinical Purposes
Source: PubMed Central journal article supplement (PMC8397434; doi:10.1021/acs.jproteome.1c00326), 2021-07-23
Supplement: pr1c00326_si_001.pdf [file pr1c00326_si_001.pdf]

Supplementary file for:

## **Bridging the polar and hydrophobic metabolome in single-run untargeted liquid chromatography-mass spectrometry dried blood spot metabolomics for clinical purposes**

Hanne Bendiksen Skogvold<sup>1, 2</sup>, Elise Mørk Sandås<sup>1</sup>, Anja Østeby<sup>1</sup>, Camilla Løkken<sup>1</sup>, Helge Rootwelt<sup>3</sup>, Per Ola Rønning<sup>2</sup>, Steven Ray Wilson<sup>4,5</sup>, Katja Benedikte Prestø Elgstøen<sup>1\*</sup>

<sup>1</sup> National Unit for Screening and Diagnosis of Congenital Pediatric Metabolic Disorders, Department of Medical Biochemistry, Oslo University Hospital, Rikshospitalet, Sognsvannsveien 20, 0372 Oslo, Norway

<sup>2</sup> Department of Mechanical, Electronic and Chemical Engineering, Faculty of Technology, Art and Design, Oslo Metropolitan University, Pilestredet 35, 0166 Oslo, Norway

<sup>3</sup> Department of Medical Biochemistry, Oslo University Hospital, Rikshospitalet, Sognsvannsveien 20, 0372 Oslo, Norway

<sup>4</sup> Department of Chemistry, University of Oslo, Sem Sælands vei 26, 0371 Oslo, Norway

<sup>5</sup> Hybrid Technology Hub-Centre of Excellence, Institute of Basic Medical Sciences, Faculty of Medicine, University of Oslo, Domus Medica, Gaustad, Sognsvannsveien 9, 0372 Oslo, Norway

Corresponding author:

Katja Benedikte Prestø Elgstøen (kelgstoe@ous-hf.no)

**Supplementary Table****Table S1.** Peak area (PA) and retention time (RT) relative standard deviation (RSD %) of selected compounds measured in a DBS injected three times each day during an analysis run of 11 days.

| <b>Compound</b>              | <b>Average PA (a.u.)<br/>N=30</b> | <b>RSD % PA (a.u.)<br/>N=30</b> | <b>Average RT (min)<br/>N=30</b> | <b>RSD % RT (min)<br/>N=30</b> |
|------------------------------|-----------------------------------|---------------------------------|----------------------------------|--------------------------------|
| <b>Ornithine</b>             | 1.81E+07                          | 4 %                             | 1.62                             | 0.3 %                          |
| <b>Arginine</b>              | 6.88E+06                          | 3 %                             | 1.75                             | 0.4 %                          |
| <b>Citrulline</b>            | 1.75E+07                          | 3 %                             | 2.19                             | 0.2 %                          |
| <b>Valine</b>                | 1.71E+08                          | 9 %                             | 2.50                             | 0.1 %                          |
| <b>Methionine</b>            | 8.17E+06                          | 7 %                             | 3.05                             | 0.2 %                          |
| <b>Leucine</b>               | 1.37E+08                          | 6 %                             | 3.33                             | 0.3 %                          |
| <b>Tyrosine</b>              | 3.34E+07                          | 5 %                             | 4.10                             | 0.3 %                          |
| <b>Phenylalanine</b>         | 6.73E+07                          | 3 %                             | 6.73                             | 0.2 %                          |
| <b>Acylcarnitine C0</b>      | 5.16E+07                          | 2 %                             | 2.11                             | 0.3 %                          |
| <b>Acylcarnitine C2</b>      | 3.10E+07                          | 4 %                             | 2.61                             | 0.2 %                          |
| <b>Acylcarnitine C3</b>      | 1.02E+06                          | 8 %                             | 4.97                             | 0.4 %                          |
| <b>Acylcarnitine C8</b>      | 2.09E+05                          | 8 %                             | 12.09                            | 0.1 %                          |
| <b>Acylcarnitine<br/>C14</b> | 3.35E+05                          | 10 %                            | 13.14                            | 0.1 %                          |
| <b>Acylcarnitine<br/>C16</b> | 2.90E+06                          | 4 %                             | 13.69                            | 0.1 %                          |
| <b>Acylcarnitine<br/>C18</b> | 1.14E+06                          | 4 %                             | 14.42                            | 0.1 %                          |

## **Supplementary Information**

### **Number of detected features and annotated/identified metabolites**

An example of the number of detected features and annotated/identified metabolites, using Compound Discoverer 2.1 (with standard settings and filters for a metabolomics workflow), in a dried blood spot positive ionization analysis: detected features: 11394. Annotated or identified metabolites: 1042.

**Supplementary figures S1-S4** (chromatograms from other evaluated columns)

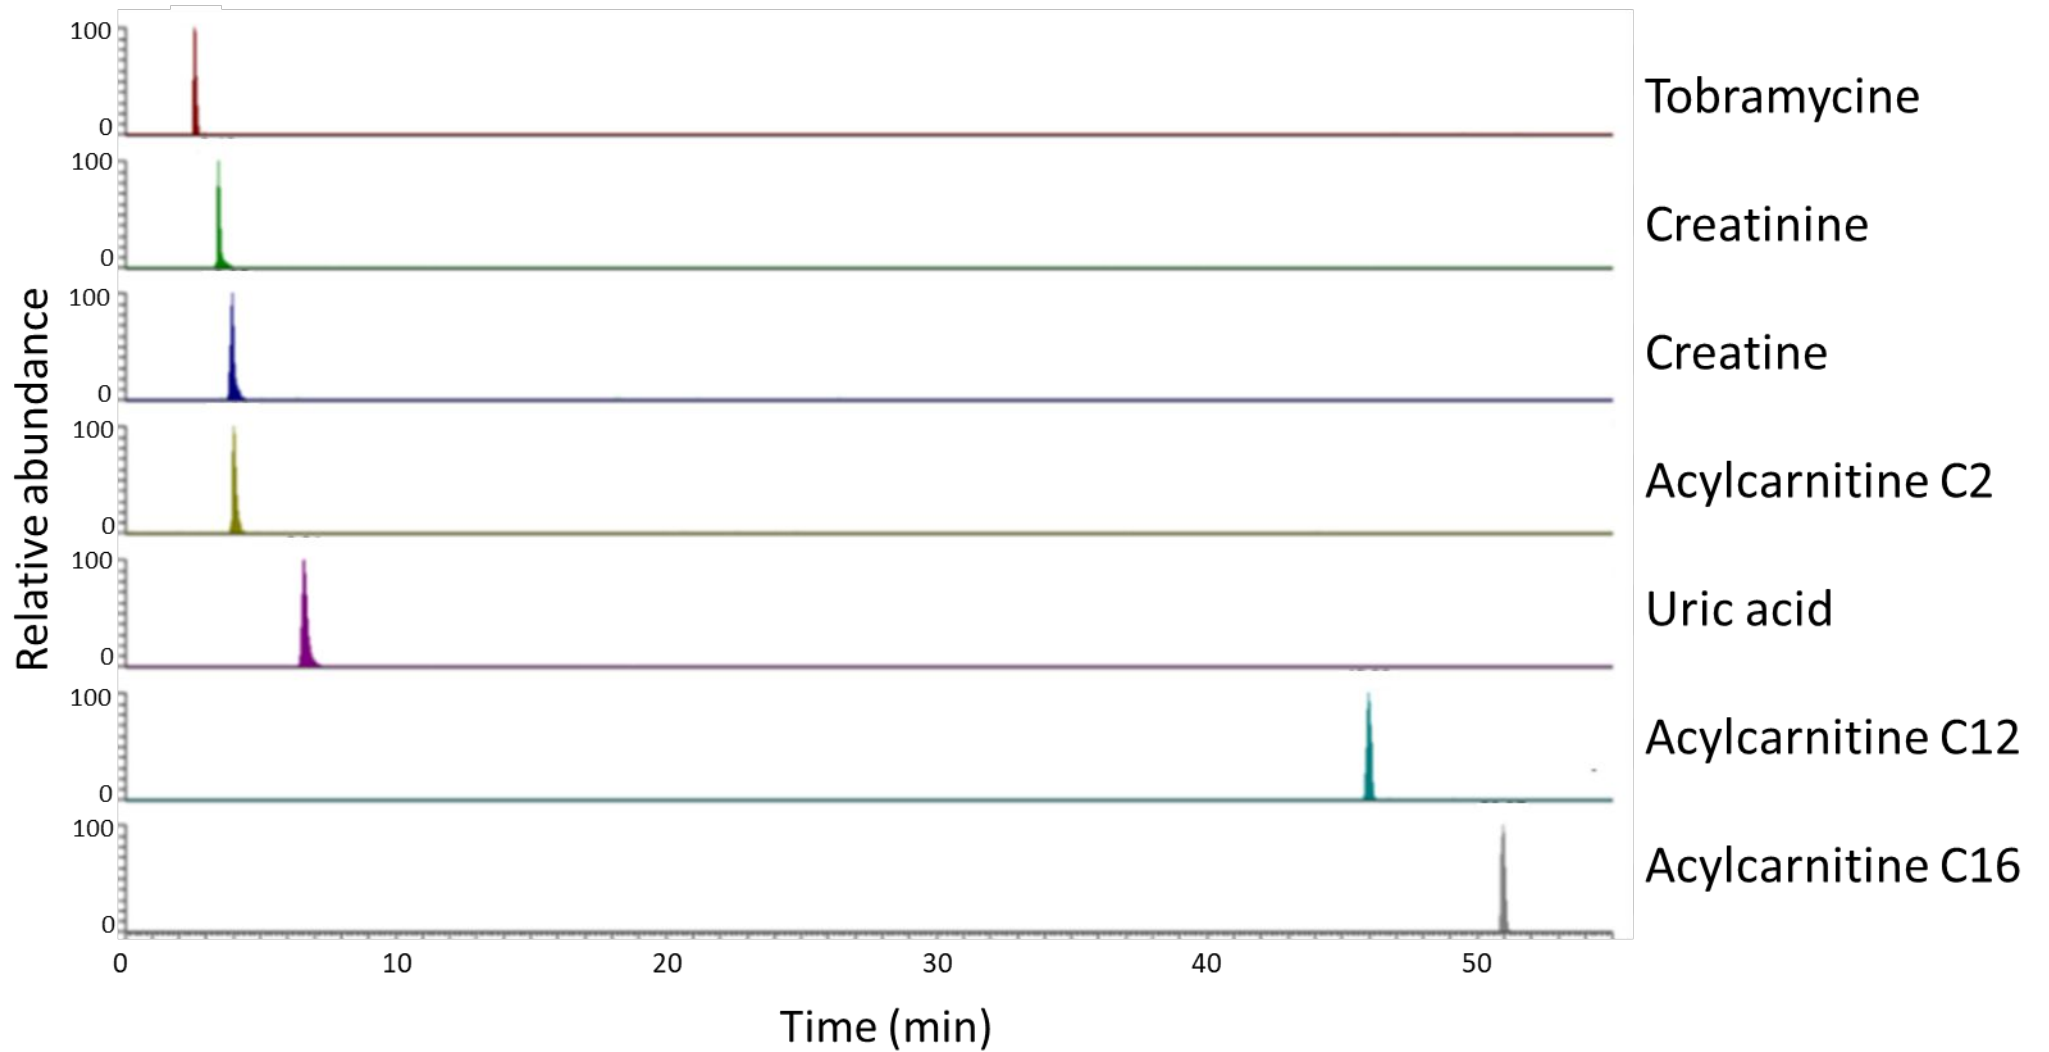

**Figure S1.** Extracted ion chromatograms of tobramycine, creatinine, creatine, acylcarnitine C2, uric acid, acylcarnitine C12 and acylcarnitine C16 using the Polaris C18-Ether column.

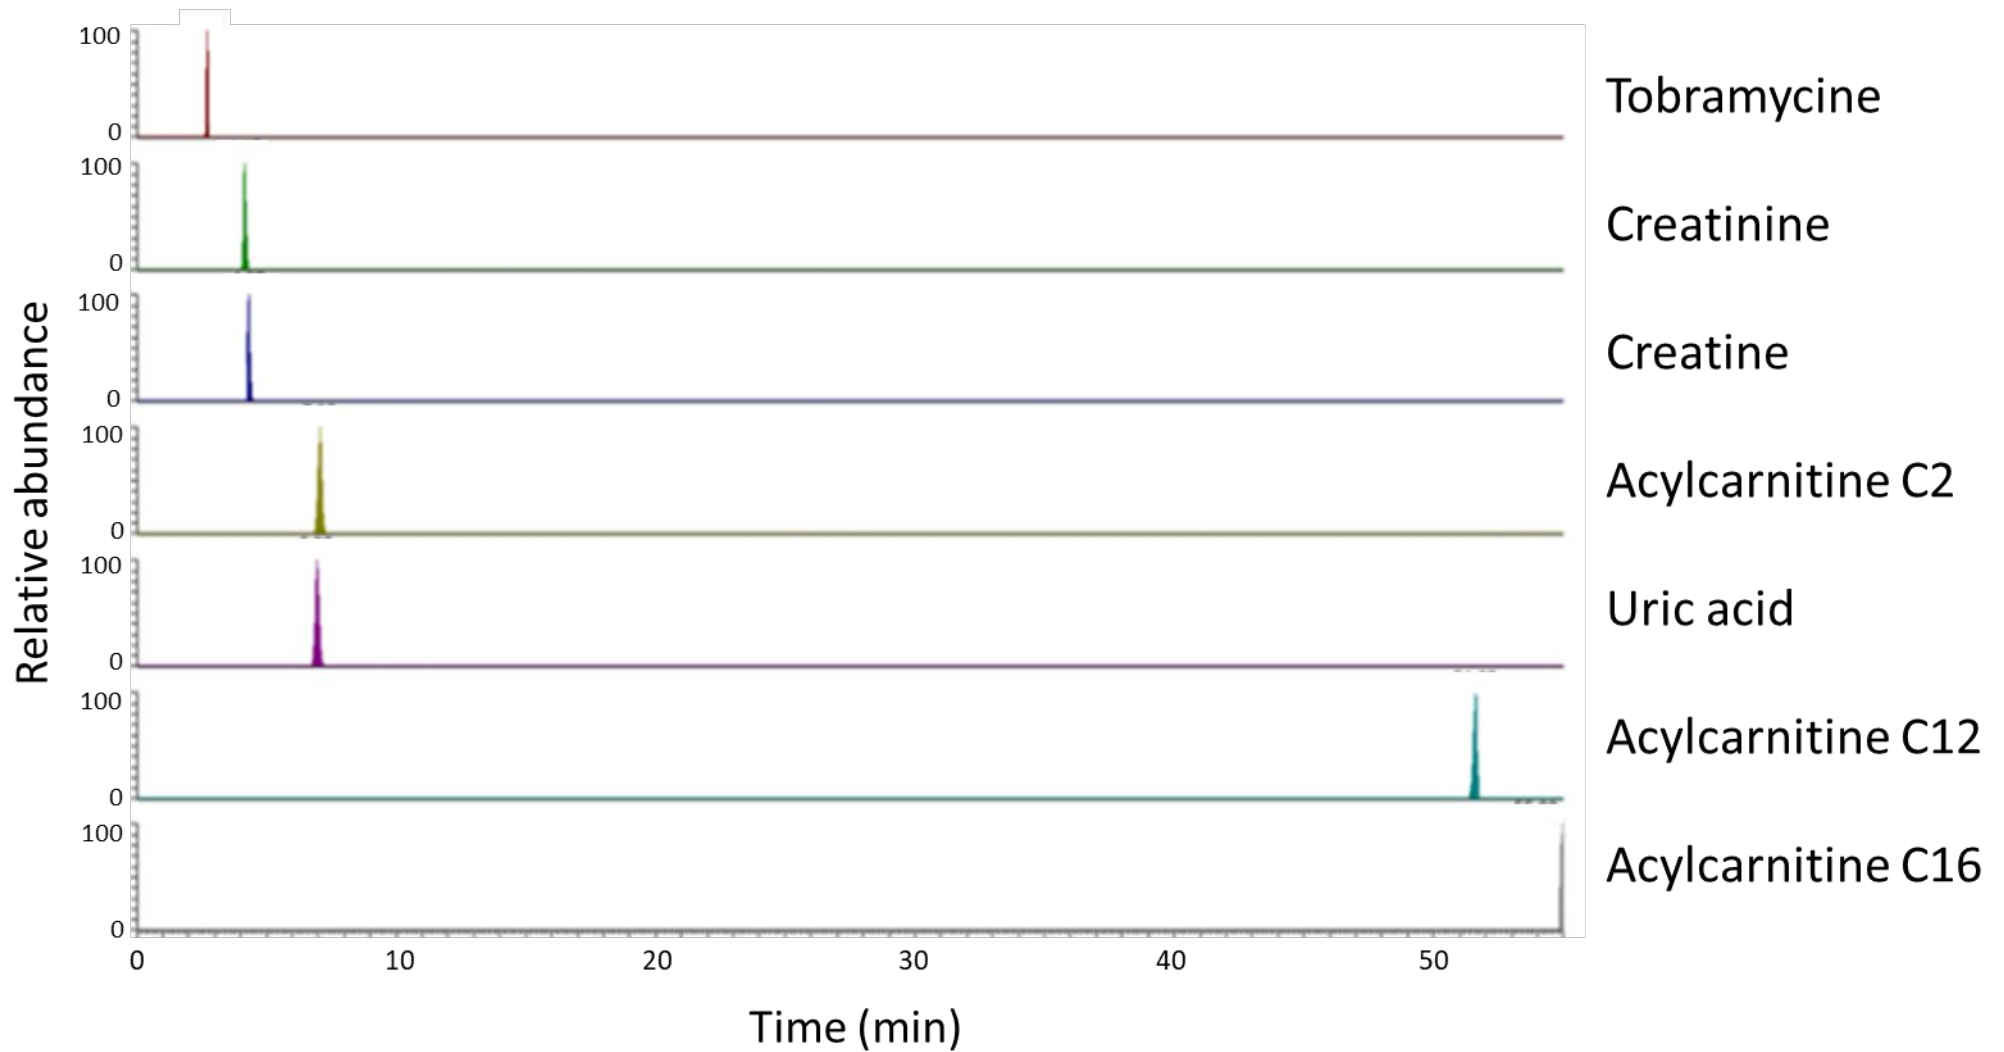

**Figure S2.** Extracted ion chromatograms of tobramycine, creatinine, creatine, acylcarnitine C2, uric acid, acylcarnitine C12 and acylcarnitine C16 using the ACE C18-PFP column.

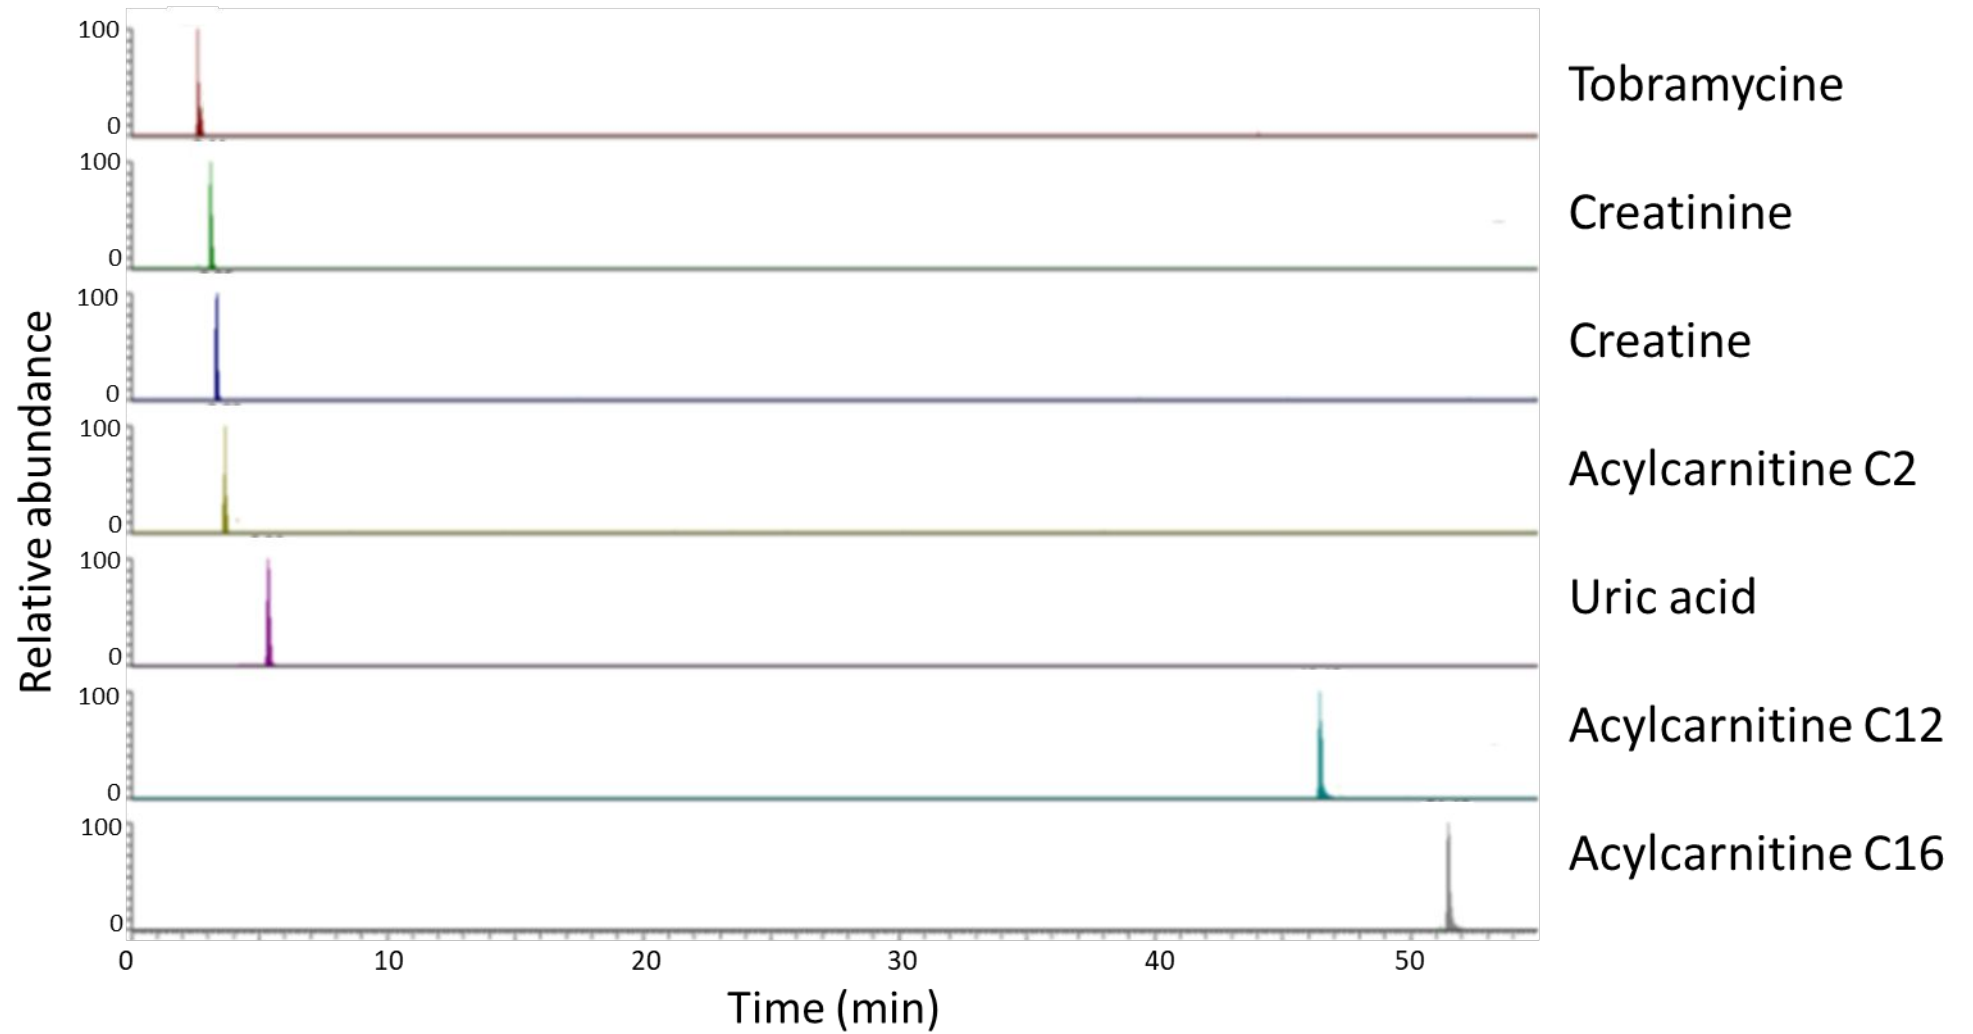

**Figure S3.** Extracted ion chromatograms of tobramycine, creatinine, creatine, acylcarnitine C2, uric acid, acylcarnitine C12 and acylcarnitine C16 using the Aeris Peptide XB-C18 column.

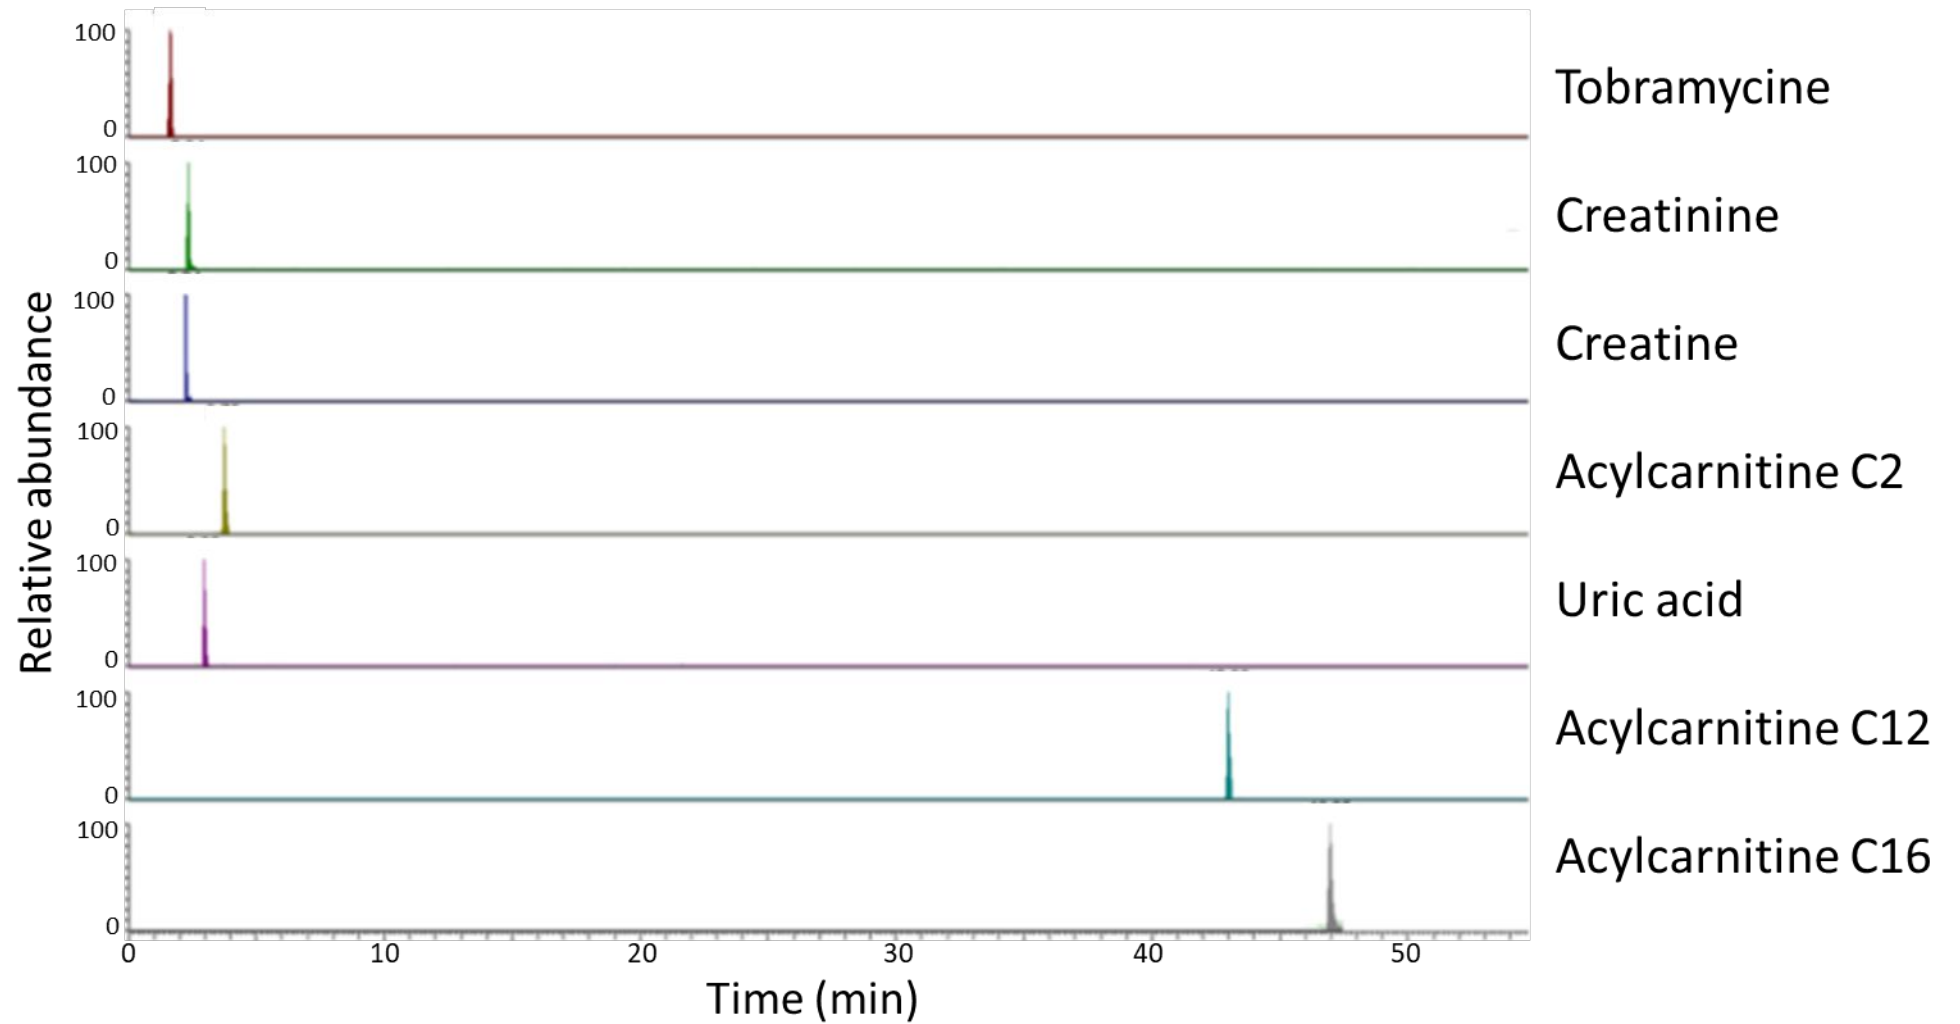

**Figure S4.** Extracted ion chromatograms of tobramycine, creatinine, creatine, acylcarnitine C2, uric acid, acylcarnitine C12 and acylcarnitine C16 using the Raptor Biphenyl column.
